# Supplementary material
Source: Research Square preprint supplement (doi:10.21203/rs.3.rs-9872041/v1)
Supplement: Supplementary file 1 [file 33b82c691db9f169fa91914b.docx]

1. Dataset Composition and Demographic Characteristics

| Dataset | Number of Patients | Number of Images | Gender (Number of Patients) | | Age Distribution (Number of Patients) | | | |
| --- | --- | --- | --- | --- | --- | --- | --- | --- |
| Female | Male | ≤18y | 18y<x≤40y | 40y≤x<60y | ≥60y |
| Training set | 596 | 823 | 300 | 296 | 130 | 162 | 154 | 150 |
| Validation set | 214 | 258 | 108 | 106 | 84 | 40 | 54 | 36 |
| Test set | 87 | 126 | 46 | 41 | 10 | 23 | 26 | 28 |
| Total | 897 | 1207 | 454 | 443 | 224 | 225 | 234 | 214 |

1. Demographic characteristics of the overall data set and the Test set

| Group | Gender | N | Minimum | Maximum | Mean | Standard Deviation |
| --- | --- | --- | --- | --- | --- | --- |
| Overall | Both | 897 | 2 | 87 | 37 | 22 |
| Overall | Male | 443 | 2 | 87 | 32 | 21 |
| Overall | Female | 454 | 4 | 83 | 41 | 22 |
| Test set | Both | 87 | 6 | 74 | 45 | 19 |
| Test set | Male | 41 | 10 | 72 | 41 | 19 |
| Test set | Female | 46 | 6 | 74 | 49 | 19 |

1. Agreement analysis between model and manual measurements on the test set (n=126)

| Measurement parameters(°) | Model Measurements(Mean±SD) | Manual Annotations (Mean±SD) | MD(95%CI) | t | p | Cohen's d |
| --- | --- | --- | --- | --- | --- | --- |
| LLA | 148.80±6.36 | 148.24±8.66 | 0.56(-0.59,1.72) | 0.962 | 0.338 | 0.09 |
| MLA | 128.47±6.76 | 128.92±8.38 | -0.45(-1.07,0.17) | -1.441 | 0.152 | 0.13 |
| AA | 15.62±2.79 | 15.10±4.19 | 0.52(-0.06,1.09) | 1.785 | 0.077 | 0.16 |
| PA | 17.47±4.25 | 18.02±5.02 | -0.55(-1.12,0.01) | -1.938 | 0.055 | 0.17 |


Confusion Matrix for the LLA Assessment Using Manual Measurements as the Reference Standard (n=126)

|  | Model:Abnormal | Model:Normal | Total |
| --- | --- | --- | --- |
| Manual:Abnormal | 52 | 5 | 57 |
| Manual:Normal | 4 | 65 | 69 |
| Total | 56 | 70 | 126 |

Note: The values in the table represent the number of cases.

Confusion Matrix for the MLA Assessment Using Manual Measurements as the Reference Standard (n=126)

|  | Model:Abnormal | Model:Normal | Total |
| --- | --- | --- | --- |
| Manual:Abnormal | 53 | 4 | 57 |
| Manual:Normal | 4 | 65 | 69 |
| Total | 57 | 69 | 126 |

Note: The values in the table represent the number of cases.

Confusion Matrix for the AA Assessment Using Manual Measurements as the Reference Standard (n=126)

|  | Model:Abnormal | Model:Normal | Total |
| --- | --- | --- | --- |
| Manual:Abnormal | 39 | 4 | 43 |
| Manual:Normal | 4 | 79 | 83 |
| Total | 43 | 83 | 126 |

Note: The values in the table represent the number of cases.

Confusion Matrix for the PA Assessment Using Manual Measurements as the Reference Standard (n=126)

|  | Model:Abnormal | Model:Normal | Total |
| --- | --- | --- | --- |
| Manual:Abnormal | 36 | 3 | 39 |
| Manual:Normal | 6 | 81 | 87 |
| Total | 42 | 84 | 126 |

Note: The values in the table represent the number of cases.

1. Detailed Performance Metrics Based on Confusion Matrix

| Measurement Parameter | Sensitivity | Specificity | Precision | F1 score | Interpretation accuracy | AUC |
| --- | --- | --- | --- | --- | --- | --- |
| LLA | 0.912 | 0.942 | 0.929 | 0.920 | 0.929 | 0.952 |
| MLA | 0.930 | 0.942 | 0.930 | 0.930 | 0.937 | 0.980 |
| AA | 0.907 | 0.952 | 0.907 | 0.907 | 0.937 | 0.966 |
| PA | 0.923 | 0.931 | 0.857 | 0.889 | 0.929 | 0.951 |
